1 **Plastic biodegradation: do *Galleria mellonella* larvae - bio-assimilate**  
2 **polyethylene? A spectral histology approach using isotopic labelling**  
3 **and infrared microspectroscopy.**

4 *Agnès Réjasse*<sup>\*a</sup>, *Jehan Waeytens*<sup>b,c</sup>, *Ariane Deniset-Besseau*<sup>c</sup>, *Nicolas Crapart*<sup>d,e</sup>, *Christina*  
5 *Nielsen-Leroux*<sup>a</sup>, *Christophe Sandt*<sup>\*f</sup>.

6 <sup>a</sup> *Université Paris-Saclay, INRAE, AgroParisTech, Micalis Institute, 78350, Jouy-en-Josas, France*

7 <sup>b</sup> *Structure et Fonction des Membranes Biologiques, Université libre de Bruxelles, B-1050 Bruxelles, Belgique*

8 <sup>c</sup> *Université Paris-Saclay, CNRS, Institut de Chimie Physique, UMR 8000, 91405, Orsay, France.*

9 <sup>d</sup> *UMR 1313 GABI, Abridge, INRAE, Université Paris-Saclay, 78350, Jouy en Josas, France,*

10 <sup>e</sup> *Excilone, 78990 Elancourt, France*

11 <sup>f</sup> *SMIS beamline, Synchrotron Soleil, L'Orme des Merisiers, BP 48 Saint Aubin, 91192 Gif-sur-Yvette Cedex,*

12 *France*

13 *\*Corresponding Authors: [agnes.rejasse@inrae.fr](mailto:agnes.rejasse@inrae.fr) and [sandt@synchrotron-soleil.fr](mailto:sandt@synchrotron-soleil.fr)*

14

15 **Keywords:** Polyethylene, plastic degradation, biodegradation, *Galleria mellonella* larvae, FTIR  
16 microspectroscopy, isotopic labelling, hyperspectral imaging.

17 **ABSTRACT**

18 Environmental pollution by non-biodegradable polyethylene (PE) plastics is of major concern,  
19 thus, organisms capable of bio-degrading PE are required. The larvae of the Greater Wax  
20 Moth, *Galleria mellonella* (Gm), were identified as a potential candidate to digest PE. In this  
21 study, we tested whether PE was metabolized by Gm larvae and could found in their tissues. We  
22 examined the implication of the larval gut microbiota by using conventional and axenic reared  
23 insects. First, our study showed that neither beeswax nor PE alone favour the growth of young  
24 larvae. We then used Fourier-Transform Infrared Microspectroscopy ( $\mu$ FTIR) to detect deuterium  
25 in larvae fed with isotopically labelled food. Perdeuterated molecules were found in most tissues  
26 of larvae fed with deuterium labelled oil for 72 hours proving that  $\mu$ FTIR can detect  
27 metabolization of 1-2 mg of deuterated food. No bio-assimilation was detected in the tissues of  
28 larvae fed with 1-5 mg of perdeuterated PED4 for 72 hours and 19-21 days, but micron sized PE  
29 particles were found in the larval digestive tract cavities. We evidenced weak bio-degradation of  
30 PE films in contact for 24 hours with the dissected gut of conventional larvae; and in the PED4  
31 particles from excreted larval frass. Our study confirms that Gm larvae can bio-degrade PE but  
32 can not necessarily metabolize it.

33

34

## 35 INTRODUCTION

36 Due to inefficient waste collection and long-life, plastics are now a major cause of  
37 environmental pollution in land and maritime environments<sup>1</sup>. Development of new biodegradable  
38 plastics and new plastic degradation processes are pursued to remediate these problems.  
39 Biodegradation offers advantages over other methods (incineration, chemical degradation) as it  
40 can be more environmentally friendly, produces less waste, and reduces cost of waste  
41 management. Polyethylene (PE), one of the most produced plastics, is considered almost non-  
42 biodegradable. Furthermore, to increase its lifetime, PE is generally synthesized with antioxidants  
43 and UV-stabilizers<sup>2</sup>. Modest biodegradation rates were reported in the literature by  
44 microorganisms from natural microbial communities<sup>3-6</sup>.

45 Another potential plastic biodegradation method reported in the literature is the use of  
46 insect larvae or their commensal gut microorganisms<sup>7-13</sup>. Several recent studies reported  
47 degradation of PE by the caterpillars of the Greater Wax Moth *Galleria mellonella*  
48 (Gm)<sup>11,12,14,15,16</sup>. There is a rational motivation for the use of these larvae. The metabolic  
49 pathways involved in the degradation of long-chain hydrocarbons (like long-chain fatty acids) are  
50 expected to play an important role in the degradation of PE that is composed of a long aliphatic  
51 chain. Since, Gm larva feeds on and metabolizes long-chain hydrocarbons from beeswax<sup>17</sup>, it  
52 may also potentially metabolize PE. If this is the case, the role of gut enzymes and the gut  
53 microbiota should be assessed. However, involvement of the larval gut microbiota may be  
54 questionable. Recently, Kong et al.<sup>14</sup> reported PE biodegradation independent of the intestinal  
55 microbiota while Ren<sup>12</sup>, Cassone<sup>16</sup> and Lou<sup>18</sup> described implication of various species from the  
56 Gm gut microbiota. In addition the original study<sup>11</sup> reporting the degradation of PE by the Gm  
57 larva was criticized on several methodological points by Weber et al.<sup>19</sup>. Indeed, the approach

58 used to investigate the potential of the larvae to metabolize PE in those studies presents several  
59 issues: gut residues on the PE films are often misinterpreted for PE oxidation; the ingestion of PE  
60 does not imply metabolization of the polymer, PE metabolization by the larvae was never  
61 demonstrated. This and the controversial results about microbiota involvement make it necessary  
62 to further investigate whether Gm larvae and/or their microbiota can really biodegrade and  
63 metabolize PE.

64 In this study, we present a methodology capable of detecting the eventual metabolization of PE  
65 by Gm larvae. First, we tested whether PE can be used as an energy source and if it provided  
66 nutritional value for the Gm larvae. Then, we used Fourier-Transform Infrared  
67 microspectroscopy ( $\mu$ FTIR) to perform hyperspectral imaging of cryo-sections of the whole  
68 larvae and we evaluated the capability of Gm larvae to bio-assimilate PE as well as its integration  
69 in the larval tissues. We developed an original protocol using polyethylene isotopically labelled  
70 with deuterium (PED4) to detect if deuterated molecules were metabolised in the Gm larval  
71 tissue after perdeuterated PE ingestion. Indeed, based on its infrared spectrum, the  $\text{—CH}_2\text{—}$  peak  
72 from PE cannot be distinguished from the  $\text{—CH}_2\text{—}$  peak from lipids in larva tissues at low  
73 concentrations whereas  $\text{—CD}_2\text{—}$  found in deuterated PE has specific absorption peaks in the  
74 infrared transparency window of the tissues and could be easily identified in the larvae. The large  
75 shift in peak positions between C-H and C-D is caused by the larger atomic mass of  
76 deuterium causing a strong shift in the vibration frequency of the C–D bonds. This method is one  
77 of the most relevant to reveal metabolization. Furthermore, PED4 and regular PE exhibit similar  
78 chemical and physical properties and their biodegradation products are expected to be identical.  
79 After metabolization, PED4 should be found as deuterated molecules containing  $\text{—CD}_2\text{—}$   
80 moieties, presumably in tissues containing long aliphatic chains molecules. Detecting  $\text{—CD}_2\text{—}$

81 groups in the tissues of the larvae should be a direct indication of PE metabolization. The  
82 sensitivity of the method was evaluated by feeding experiments with deuterated oil. The  
83 implication of the gut microbiota in the biodegradation process was evaluated using both  
84 conventional and axenically reared larvae (without microbiota). The PE nutritional value was  
85 evaluated by following larval growth with different diets at two development stages.

86

## 87 **MATERIALS AND METHODS**

### 88 *PE materials*

89 Low density PE supermarket bags were used for insect feeding and growth experiments. High  
90 density PE bags were used for assessing the oxidation of PE in contact with the dissected Gm  
91 larva gut. Perdeuterated PE powder (PED4) was purchased from Medical Isotopes Inc (Pelham,  
92 NH, USA). The PEs used in this study were characterized by High-Temperature Gel Permeation  
93 Chromatography (HT-GPC) by the Peakexpert company (Tours, France). HT-GPC was  
94 performed at 150°C in stabilized trichlorobenzene on Agilent Mixed-B columns. Columns were  
95 calibrated with polystyrene references. The molecular weights were found as follows:

| <b>Sample</b>   | <b>Mn<br/>(g/mol)</b> | <b>Mw<br/>(g/mol)</b> | <b>Mz<br/>(g/mol)</b> |
|-----------------|-----------------------|-----------------------|-----------------------|
| LDPE bags       | 40,737                | 249,031               | 679,051               |
| HDPE bags       | 34,151                | 641,115               | 4,277,300             |
| polyethylene-D4 | 139,715               | 821,776               | 3,354,440             |

96

### 97 *Insect rearing and feeding*

98 *Gm* larvae were produced on site in the insectarium at INRAE Micalis Institute at Jouy-en-Josas.  
99 *Gm* eggs were hatched at 27 °C, and the larvae were reared on beeswax and pollen (La Ruche  
100 Roannaise, Roanne, France).

101 The moths laid eggs on paper that were directly placed on pollen and covered with beeswax in  
102 closed aerated plastic boxes. For the axenic larvae, eggs were first sterilized by 10 min exposure  
103 on each side with UV light at 254 nm, and fed with gamma-ray sterilized pollen and beeswax in  
104 an autoclaved glass jar with aerated lid covered by sterile gauze and carded cotton. The boxes and  
105 the jars were placed in a incubator at 27 °C simulating the day-night cycle. In order to verify that  
106 the larvae were axenic, 2 larvae were crushed and homogenized with a sterilized pestle in 500 µl  
107 sterile physiological water, 100 µL of the suspension were spread on a BHI Petri dish. No  
108 bacterial growth was observed after 7 days at 37 °C and no bacterial 16S DNA was found  
109 following V3/V4 PCR (For conventional larvae 10<sup>6</sup> bacteria/larva are found)

#### 110 ***Effect of diet on insect growth***

111 L2-L3 early stage larvae (20 mg each) were placed individually in 12-well plate wells and were  
112 either starved or fed *ad libitum* with one of five different diets: beeswax alone, pollen alone,  
113 LDPE alone, beeswax + pollen, beeswax + LDPE. Six larvae were used for each diet for a total of  
114 36 larvae. The food uptake was evaluated by weighing the remaining food. The larvae were kept  
115 at 27 °C and weighted individually every 2-3 days. The test was continued for 16 days until the  
116 larvae fed a beeswax + pollen diet reached stage L6.

117 A second test was carried out with another batch of L6, ( last larval stage /160 mg), 36 larvae (6  
118 for each diet)). The larvae were placed individually in 6-well plates at 27 °C and fed as

119 previously described. The larvae reached the chrysalis stage in 8-10 days; the test was carried-out  
120 for an additional 12 days until the adult stage.

121 The average growth of the 6 larvae and the standard deviations were calculated with the "Origin  
122 Pro 2016" software (Origin lab, Northampton, MA).

123

#### 124 ***Perdeuterated oil feeding***

125 Five conventional and 5 axenic L6 stage larvae were starved for 24 hours before free-feeding for  
126 24 or 72h with pollen soaked with perdeuterated oil (N-hexadecane (C<sub>16</sub>D<sub>34</sub>, 98%) Cambridge  
127 Isotope Laboratories, Inc. USA). Larvae fed for 24h ingested 6.7 mg of pollen and 1.6µL of oil  
128 (poids ?) and larvae fed for 72h ingested 20 mg of pollen and 4.8 µL of oil.

#### 129 ***Perdeuterated polyethylene (PED4) feeding***

130 PED4 films were prepared either by pressing PED4 powder at 140 °C for 15-30 minutes in an in-  
131 house designed pressgiving 30 to 40 µm thick films, or by pressing PED4 powder at room  
132 temperature for 1 minute at 15 ton/cm<sup>2</sup> in a Specac manual hydraulic press (Eurolabo, Paris,  
133 France).

134 Two batches of L6 stage larvae (5 axenic and 5 conventional) were starved for 24h at 27 °C in  
135 individual boxes. The larvae were then allowed to feed freely on PED4 films for 3 days with an  
136 allowance of at least 0.85 mg of PED4 per day. The larvae were then killed by quick freezing in  
137 SnapFrost equipment and cryo-sectioned. The amount of PED4 ingested was evaluated by  
138 weighting the PED4 film leftover and feces were collected and stored at -80 °C for further  
139 evaluation. Only larvae fed with more than 1 mg of PED4 were analyzed by µFTIR. Three axenic

140 and three conventional larvae were fed for up to 19-21 days with PED4 alternating with pollen  
141 diets to allow survival.

142

### 143 ***Cryo-sectioning and preparation for hyperspectral IR imaging***

144 The cryo-sections were prepared on the Abridge platform (INRAE, Jouy-en-Josas, France). The  
145 larvae were frozen in a SnapFrost system (Excilone, Elancourt, France) in isopentane at -80 °C  
146 then stored at -80 °C. Ten and twenty micron sagittal sections were cryo-sectioned at -20 °C with  
147 a Shandon FSE cryostat (ThermoFisher Scientific, Courtaboeuf, France). The 20 µm thick  
148 sections improved the sensitivity of the detection for the weak C-D peaks but tissue lipid and  
149 protein peaks were saturated. - Consecutive sections were made for both kinds of sections and  
150 deposited on different slide supports: on StarFrost (Knittelglass, Germany) for immediate cresyl-  
151 violet staining, on IR-grade polished IR-transparent CaF<sub>2</sub> slides (Crystran, Poole, UK) for IR  
152 hyperspectral imaging. The sections on CaF<sub>2</sub> were stored in a desiccator under a continuous flow  
153 of nitrogen until analysis.

154

### 155 ***Hyperspectral FTIR Imaging***

156 Fourier-Transform Infrared hyperspectral images were recorded at the SMIS beamline on a Cary  
157 620 infrared microscope (Agilent, Courtaboeuf, France) equipped with a 128 x128 pixels Lancer  
158 Focal Plane Array (FPA) detector and coupled to a Cary 670 spectrometer. Hyperspectral images  
159 were measured in transmission in the standard magnification mode with a 4X/0.2 NA  
160 Schwarzschild objective and matching condenser giving a field of view of 2640 x 2640 µm<sup>2</sup>, and



161 a projected pixel size of 20.4 x 20.4  $\mu\text{m}^2$ . The actual spatial resolution of the images was  
162 evaluated by the step-edge method to be approximately 40  $\mu\text{m}$  at 1545  $\text{cm}^{-1}$  and 30  $\mu\text{m}$  at 2915  
163  $\text{cm}^{-1}$ . Mosaics composed of several FPA tiles were recorded to image whole sections.

164 Hyperspectral images were recorded between 900 and 3900  $\text{cm}^{-1}$  at 8  $\text{cm}^{-1}$  resolution, with 256  
165 and 128 co-added scans for background and sample respectively.

166

### 167 ***Synchrotron Radiation FTIR Microspectroscopy (SR- $\mu$ FTIR)***

168 SR- $\mu$ FTIR was performed at the SOLEIL synchrotron facility on the SMIS beamline<sup>20</sup>. The  
169 synchrotron was operated at 500 mA in top-up mode for injections. Spectra and maps of the  
170 sections were recorded using Continuum microscopes coupled to Nicolet 8700 or 5700  
171 spectrometers (Thermo Fisher Scientific, Courtaboeuf, France). The microscopes were equipped  
172 with 32X/0.65NA Schwarzschild objectives and matching condensers, and liquid-cooled narrow-  
173 band MCT/A detectors. Spectra were recorded in transmission mode at 6  $\text{cm}^{-1}$  resolution with 16  
174 to 32 scans between 650 and 4000  $\text{cm}^{-1}$ . The confocal aperture of each microscope was set at 12  
175 x 12  $\mu\text{m}^2$ .

### 176 ***Data analysis***

177 Spectral images were computed in ResolutionPro (Agilent) and in Quasar<sup>21,22</sup>. Spectral images  
178 were created using the baseline-corrected, integrated areas of the peaks of interest. Lipid and  
179 protein distributions were imaged by the C-H stretching peaks of  $\text{CH}_2$  and  $\text{CH}_3$  between 2800 and  
180 3000  $\text{cm}^{-1}$  and the amide I band between 1590 and 1705  $\text{cm}^{-1}$  respectively. The deuterated PE  
181 was detected and imaged by symmetric and asymmetric  $\text{CD}_2$  stretching peaks at 2085  $\text{cm}^{-1}$

182 (2030-2130  $\text{cm}^{-1}$ ) and 2190  $\text{cm}^{-1}$  (2165-2230  $\text{cm}^{-1}$ ). The deuterium/protein peak area ratio was  
183 computed with protein band area integrated between 1480 and 1720  $\text{cm}^{-1}$ . K-means clustering of  
184 the hyperspectral images and computation of Pearson correlation coefficients between peak-area  
185 ratios were performed in Quasar. K-means clustering is a multivariate pattern-recognition method  
186 that allows clustering spectra based on their similarity, 10 runs and 300 iterations were used.  
187 Water vapour subtraction was performed in Matlab 2016 (MathWorks, Natick, MA) with an in-  
188 house script.

189

## 190 **RESULTS**

### 191 *Nutritional value of PE*

192 To estimate the relative nutritional value of PE as energy source for Gm, we compared the food  
193 uptake, weight gain and larval survival for different diets: control (nothing), pollen alone,  
194 beeswax alone, beeswax + pollen, LDPE alone, LDPE + pollen. We set up growth experiments  
195 with conventional larvae at two different stages (Figure 1A, 1E): young larvae (stage L2-L3, 20  
196 mg per larva) and last instar (stage L6, 160 mg).

197 For L2-L3 larvae (Figure 1B) the nibbling of PE was difficult to observe, LDPE consumption  
198 was estimated by weighting the remaining PE (Supplementary Table 1). The larval weight uptake  
199 was followed up to 16 days. The weight of larvae fed with a pollen-beeswax diet increased 10  
200 times while with a pollen-only diet, it increased 3 times, and 1.3 times with a beeswax-only diet.  
201 The pollen-beeswax diet was the optimal condition for Gm larval growth. The control larvae,  
202 without food, died after 3 days. Larvae fed with only LDPE lost weight (1.3 fold), did not change  
203 growth stage, and exhibited 50% mortality at day 3 and 100% mortality at day 6, probably due to

204 starvation. Larvae fed with both LDPE and pollen did not gain weight compared to larvae fed  
205 only with pollen. This indicated that, although they consumed LDPE (Figure 1B), it did not  
206 provide energy for growth or survival at early development stages (see Supplementary Table 1  
207 for detailed diet consumption).

208 For L6 larvae, LDPE consumption was observed directly on PE films as well as residues of  
209 colored PE in the excreted feces (Figure 1C). We followed the growth of L6 stage larvae fed  
210 with different diets for 7 days ( Figure 1D, and Sup dat Table 2).The results demonstrate that as  
211 for the young larvae, the best diet was a combination of beeswax and pollen, since the larvae  
212 almost doubled weight in 7 days. Larvae fed with pollen-only diet, wax-only diet or LDPE-pollen  
213 diet survived but did not gain weight. Larvae fed with LDPE-only diet lost 25% of their weight as  
214 did the control larvae (no food) but all survived and were able to complete metamorphosis into a  
215 moth, like in all the other conditions. In average, larvae fed with a pollen-LDPE diet had each  
216 consumed 0.48 mg LDPE /day/, larvae fed with LDPE-only diet consumed 0.37 mg LDPE/day/;  
217 these rates are similar to those in Lou<sup>18</sup> (0.60 mg PE/day/larva) but inferior to those reported by  
218 Bombelli<sup>11</sup> (1.84 mg PE/day/larva).

219 These experiments showed that conventional Gm larvae have eaten PE but no apparent  
220 nutritional value was observed nor measured.

221

## 222 ***Hyperspectral infrared imaging of larva cryo-sections***

223 Although the larvae did gain weight by eating PE in the aforementioned experiment, it does not  
224 prove that Gm larvae or their microbiota could not metabolize small quantities of PE. Therefore,  
225 we developed a method based on  $\mu$ FTIR hyperspectral imaging for measuring the chemical tissue

226 composition of the Gm larvae. The ultimate goal was to detect the presence of metabolized PE in  
227 the tissue following ingestion with deuterated PE.

228 First, we set up  $\mu$ FTIR hyperspectral imaging experiment to measure the spectral tissue  
229 composition (sugars, proteins and lipids) and if deuterium can be detected in Gm larvae thin-  
230 sections in larvae fed with an optimal pollen and wax diet. Hyperspectral infrared images of 10  
231  $\mu$ m thick cryo-sections of control larvae were recorded (Figure 2A-E). The spectra and peak area  
232 used to generate the spectral maps are shown in Figure 2L and Supplementary Figure S1.  
233 Representative spectra from different tissues were obtained by classifying all the larval tissue  
234 spectra in 4 groups by k-means clustering (Supplementary Figure S1A). All IR absorption spectra  
235 from the larval tissues were typical to other biological tissues. They were dominated by the  
236 absorption bands of the stretching vibration of O-H and N-H bonds present in sugars and proteins  
237 at 3400 and 3300  $\text{cm}^{-1}$ ; C-H peaks from lipids and proteins between 3020 and 2800  $\text{cm}^{-1}$ , C=O  
238 peaks from esterified lipids at 1740  $\text{cm}^{-1}$  and carboxylic acids at 1710  $\text{cm}^{-1}$ ; CONH peaks from  
239 proteins at 1654 and 1545  $\text{cm}^{-1}$ , C-H and COOH peaks between 1480 and 1350  $\text{cm}^{-1}$ ; P=O peaks  
240 at 1240 and 1080  $\text{cm}^{-1}$ , C-OH, C-OP and COC and COH peaks from carbohydrates and lipids at  
241 1160, 1150, 1100, 1035 and 1025  $\text{cm}^{-1}$ . While proteins peaks are generally the most intense peaks  
242 in the spectra of most animal tissues, peaks from phospholipids and esterified lipids (C-H, C=O,  
243 C-OC, and C-OP) strongly dominated the spectra of larva tissues showing their extremely high  
244 lipid concentration. The C=C-H olefinic peak from unsaturated lipids at 3008  $\text{cm}^{-1}$  was detected  
245 in the lipid rich tissues evidencing a strong lipid unsaturation level. In Figure 2B and 2C, we  
246 present respectively the protein and lipid hyperspectral images from the control larva section  
247 shown in Figure 2A. Silk glands and some epithelial regions (evidenced by the amide I band at

248 1650  $\text{cm}^{-1}$ ) appeared like red hotspot in the protein image while fatty tissues (evidenced by  
249 esterified lipids by the ester C=O peak at 1740  $\text{cm}^{-1}$ ) appeared red in the lipid image.

250 Detection of the natural abundance of deuterium in control larva was done by looking at the  
251 2000-2200  $\text{cm}^{-1}$  range that contains the strong C-D stretching peaks. The typical C-D peaks are  
252 shown in Supplementary Figure S1B in the spectrum of deuterated PED4 (red) and of deuterated  
253 oil (green) dominated by the C-D stretching peak at 2197 and 2098  $\text{cm}^{-1}$ , shown along with the  
254 spectrum of a normal PE film (blue) dominated by the methylene ( $-\text{CH}_2-$ ) peaks at 2914 and  
255 2848  $\text{cm}^{-1}$ . Since the larval tissue was so rich in lipids, the highest concentration of deuterium  
256 might be found in the fatty tissues. Figure 2D and 2E show hyperspectral maps of the larva cryo-  
257 section at 2197 and 2098  $\text{cm}^{-1}$  respectively, evidencing the absence of detectable C-D peaks in  
258 the control larvae. The faint tissue contours observed in Figure 2E arise from baseline drifts  
259 caused by IR radiation scattering at the edge of the tissue and not from the C-D peak

260

### 261 *Detection of deuterium in cryo-sections of larva fed with deuterated oil*

262 In order to prove that deuterium could be detected (as C-D bonds) in larvae that had ingested  
263 deuterated food, conventional and axenic larvae were fed during 24 and 72 h with C16D34  
264 perdeuterated oil. The oil was mixed with pollen to facilitate its ingestion since larvae would not  
265 ingest pure oil. In average each larva had ingested 1.2 mg of oil in 24 h and 3.7 mg in 72 h. The  
266 larvae were then cryosectioned and the thin sections were investigated by  $\mu\text{FTIR}$  (Figure 2F-K).  
267 Weak C-D signal could be detected after 24 h at discrete locations (not shown) but C-D signal  
268 was consistently detected in most tissues after 72 h of feeding (Figure 2I, 2J). This suggests that  
269 the threshold for consistent detection was around 2-2.5 mg of ingested deuterated food. The C-D

270 signal was detected at discrete locations throughout the sections and appeared stronger in some  
271 lipid rich tissues. The related spectra can be seen in Supplementary Figure S1C showing the pure  
272 C<sub>16</sub>D<sub>34</sub> oil spectrum and the spectra from the different larval tissues. We found a moderately  
273 positive correlation between the distribution of lipids and deuterated molecules with a Pearson  
274 correlation coefficient of 0.42 between the C-D and lipid signals. This confirmed that deuterated  
275 food assimilation could be detected more sensitively in the fat tissues. Figure 2K shows a zoom  
276 on a C-D rich region, the spectra are shown in Supp. Figure S1D. The C-D signal measured with  
277 the  $\mu$ FTIR imaging system was low with a maximum of 0.025 A.U. at 2197 cm<sup>-1</sup> in the hot spot  
278 shown in Figure 2K. We used a confocal microscope coupled to a synchrotron source to improve  
279 measurement sensitivity and accuracy (Figure S1E) and measured one order of magnitude higher  
280 C-D signal (up to 0.20 A.U.) than with the imaging system. The synchrotron data were then  
281 used to examine if the oil was changed upon metabolization: the CD<sub>2</sub> peak position (sensitive to  
282 molecule environment) and the CD<sub>2</sub>/CD<sub>3</sub> ratio (related to the aliphatic chain length) were  
283 determined and compared in the pure oil and in the deuterated fatty tissues. The CD<sub>2</sub>/CD<sub>3</sub> ratio  
284 measured at 24 different positions in the larval tissue varied between 0.72 and 3.6 (mean 2.16)  
285 and was different from its value in the pure oil (1.92) showing that the oil was fragmented and  
286 CD<sub>2</sub> moieties were integrated in short and in longer chain lipids. This supported the idea of  
287 metabolization of the oil in the larva. The CD<sub>2</sub> peak positions in pure oil and in the tissues were  
288 not significantly different at  $2197.1 \pm 1.2$  cm<sup>-1</sup> and  $2197.3 \pm 0.4$  cm<sup>-1</sup> respectively, according to  
289 a Student T-test. The positions of C-D peaks are sensitive to the conformation of lipids<sup>23</sup>, to their  
290 local environment, and to the long range order such as the organization in amorphous gel or  
291 liquid crystal. This showed that the deuterated lipids were in similar environments in the pure oil  
292 and in the tissues

293 These results clearly demonstrate that the larvae were able to metabolize and integrate deuterated  
294 food into their fatty tissue and that  $\mu$ FTIR hyperspectral imaging is sensitive enough to detect the  
295 C-D signal.

### 296 *Investigations into cryo-sections of larva fed with deuterated PE*

297 Therefore, next we investigated whether Gm larvae fed with deuterated PE were able to  
298 assimilate PE by seeking the appearance of C-D peaks in the larval tissues. Similarly, we  
299 recorded hyperspectral infrared images from sections o from 5 conventional and 5 axenic L6  
300 larvae fed for 3 days with deuterated PE (PED4), and 2 conventional and 2 axenic control larvae  
301 fed with non-deuterated PE. For each larva, two cryo-sections, one 10  $\mu$ m thick and one 20  $\mu$ m  
302 thick, were analysed.. Three additional L3 larvae were fed for 19 days with PED4 alternating  
303 with a pollen diet to keep them alive. Each larva ingested in average 2.1 mg of PED4 This  
304 corresponds to 0.7 mg PED4/day/larva for L6 larvae. This rate is similar to that of normal LDPE  
305 and for those reported in the literature in Lou et al.<sup>18</sup>

306 The results are presented in Figure 3 which shows visible and IR hyperspectral images of one  
307 representative larval cryo-section for each condition. IR hyperspectral images of protein peak at  
308 1650  $\text{cm}^{-1}$  and  $\text{CD}_2$  peak at 2197  $\text{cm}^{-1}$  are shown. In the control axenic and conventional larvae,  
309 no absorption of C-D could be detected in the tissues, as expected, and no C-D peak was detected  
310 in the tissues of the 5 conventional and 5 axenic larvae fed for 3 days with PED4. To ensure that  
311 it was not due to a sensitivity issue, 20  $\mu$ m thick sections were studied, giving the same results. In  
312 order to further boost the sensitivity of the method another set of conventional and axenic L3  
313 stage larvae was fed during 12 to 19 days with PED4. To make sure that the larvae could survive  
314 over 6 days with this low nutritional value diet, the 12- and 19-days periods were cut in periods

315 of 3 days alternating between PED4-only diet and PED4 plus pollen diet. These L3 larvae had  
316 consumed  $3.6 \pm 1.1$  mg PED4 per larva at the end of the experiment at rates of 0.19 to 0.28 mg  
317 PED4/day/larva.

318 No C-D peak was detected in the tissues of these larvae (Cv2 and Ax2 in Figure 3).

319 However, particles with a C-D signal were detected in cavities of the digestive tract such as the  
320 mouth, the gut and the rectum in 6 out of 10 of the conventional and axenic larvae fed with  
321 PED4. This corresponded to the presence of micron sized PED4 particles (25-50  $\mu\text{m}$ ) and  
322 aggregates (up to 1000  $\mu\text{m}$ ). The larger PED4 particles were observed in the oral cavity and  
323 rectum. No differences were observed between axenic and conventional larvae. The particles  
324 appeared more numerous in the mouth and rectum and fewer particles were found in the gut.  
325 Since no embedding was used it is possible that some of the gut particles were lost during  
326 sectioning. While the largest particles could be detected by visual observation in the micrograph  
327 images, the C-D IR signature allowed detecting smaller particles. The spectral signature allowed  
328 confirming the chemical nature of the particles. To investigate whether smaller particles present  
329 in the gut could escape detection with hyperspectral imaging we also recorded SR- $\mu\text{FTIR}$  maps  
330 and were able to detect micron-sized PE particles in the gut of the larvae (Figure S1F). We also  
331 tried to evaluate whether the PED4 found in the digestive tract was oxidised by analysing the  
332  $\text{CD}_2/\text{CD}_3$  ratio of the gut particles using the SR- $\mu\text{FTIR}$  data. However, most particles were either  
333 too thick or too scattering to yield good quality spectra that could be used for such analysis.

### 334 ***Biodegradation of PE by Gm larvae***

335 The absence of PE bio-assimilation could be due to an inability of our Gm larva population to  
336 bio-degrade PE. We investigated this ability by using two methods:; detection of PED4 oxidation



337 by  $\mu$ FTIR imaging of HDPE films in contact with the dissected guts of Gm larvae and analysis of  
338 the CD<sub>2</sub>/CD<sub>3</sub> ratio of PED4 particles in the Gm larval frass by ATR-FTIR. The results are detailed  
339 in the Supporting Information. Weak PE oxidation was detected in the PE films in contact with the  
340 gut of conventional Gm larvae (Figure S2) by  $\mu$ FTIR imaging but not with guts from the axenic  
341 larvae. Meanwhile the results did not allow to conclude on the implication of the Gm microbiota  
342 since variation were found among the replicates.

343 The CD<sub>2</sub>/CD<sub>3</sub> ratio was 15% lower for the PED4 particles (2.91±0.32) measured in the larval  
344 frass compared to PED4 films (3.42±0.40) suggesting shorter aliphatic chains in the digested  
345 PED4, thus indicating chemical modification and bio-degradation of PED4 (Figure S3).

346

347

## 348 **DISCUSSION**

349 The capability of Gm larvae to digest and bio-assimilate PE is controversial<sup>11,12,14,16,19,24</sup> and  
350 necessitates further investigation. The role of the Gm microbiota is also disputed.<sup>12,14,18</sup> We  
351 therefore examined whether the Gm larvae with and without microbiota were only chewing PE or  
352 were truly able to digest and metabolize it.

353 Feeding experiments showed that pollen+beeswax was the optimal diet in agreement with  
354 literature.<sup>14,17</sup> Early larval stages L2-L3 fed with PE lost weight, and died in 3 days (50%) to 10  
355 days (100%). This trend is similar to results from Lou (50% death at 15 days).<sup>18</sup> Kong reported  
356 100% survival but 20-30% weight loss in PE-fed Gm larvae in 14 days.<sup>14</sup> Billen reported that a  
357 LDPE diet was not sufficient for sustaining Gm larva growth.<sup>24</sup> Lemoine reported a 50% weight  
358 low on a PE diet.<sup>25</sup> Our results suggested that a pollen-only diet is sufficient for the survival of  
359 the larvae and that an additional source of carbon such as beeswax allows larvae to gain weight,

360 in agreement with the literature<sup>17,14</sup>. L2-L3 larvae fed with pollen and PE survived 16 days and  
361 gained some weight but far less than the larvae fed with the optimal diet.

362 This trend was confirmed with the last stage (L6) larvae fed only with PE as they lost weight  
363 compared to larvae fed with pollen or beeswax and consumed 80 times less food than larvae with  
364 beeswax. We did not observe significant differences in feeding behaviour or weight gain between  
365 conventional and axenic larvae suggesting that the microbiota may not be important for their  
366 development and lifecycle under our condition, similar to Kong.<sup>14</sup> Also for L6 larvae, the final  
367 life cycle was similar for Gm larvae fed with PE or beeswax: after 8 days the larvae pupated, the  
368 adult moths appeared 1 week later and egg production was similar. These experiments showed  
369 that PE does not have nutritional value for the Gm larvae. Larvae at early L6 stage have  
370 accumulated enough reserves to continue their lifecycle even if their diet is changed to PE alone  
371 whereas larvae at an early stage cannot survive with PE alone.

372 We then evaluated whether PE could be bio-assimilated by Gm larva. We used a new approach  
373 based on the  $\mu$ FTIR hyperspectral imaging of carbon-deuterium bonds in cryo-sections of larvae  
374 fed with deuterated PE. This method could, potentially, not only allow showing the  
375 metabolization of PE, but also help finding in which tissue PE metabolites accumulate, and what  
376 kind of biomolecules might be synthesized using PE. We first confirmed that it was possible to  
377 detect the metabolization of deuterated food in the tissues of larvae fed with perdeuterated oil  
378 mixed with pollen: C-D signal was indeed detected in most tissues and predominantly in fat body  
379 tissues after a 3-days diet in both axenic and conventional larvae. The  $CD_2/CD_3$  peak area ratio  
380 was modified compared to the original oil signal showing that the oil was integrated in shorter  
381 and in longer aliphatic chains. This demonstrated that  $\mu$ FTIR could detect C-D signal in tissue  
382 sections from larvae that had ingested and metabolized 1-4 milligrams of deuterated food.

383 On the contrary, we could not detect any C-D signal in L6 larvae fed with PED4 during 3 days or  
384 during 19-21 days, although they had ingested PED4. The absence of C-D signal proved that the  
385 PE was not metabolized and integrated in the larvae body in substantial quantities. This should  
386 not be due to a lack of sensitivity of the spectroscopic method since the larvae ingested 2.1 mg of  
387 PED4 per larva after 3 days and 3.6 mg of PED4 per larva after 19 days (up to 5 mg) and a C-D  
388 signal was detected when larvae ingested less than 4 mg of deuterated oil. Meanwhile, PED4  
389 micro-particles were detected in the mouth, gut and rectum of the larvae confirming that Gm  
390 larvae were able to break and masticate the PE films in smaller, micron sized, particles. Instead of  
391 metabolizing the plastic, the larvae generated micron-sized particles which could be worse for the  
392 environment and more difficult to collect than larger pieces of plastic<sup>24</sup>.

393 Yang et al.<sup>26</sup> observed negligible integration of <sup>13</sup>C in the body of the beetle larvae of *Tenebrio*  
394 *molitor* Linnaeus; fed with <sup>13</sup>C polystyrene (PS), and found that large fraction of the <sup>13</sup>C was  
395 integrated in the CO<sub>2</sub> produced by the gut bacteria. Recently, independent results by Cassone et  
396 al.<sup>16</sup> and Ren et al.<sup>12</sup> both reported that bacteria isolated from the Gm larva gut were able to grow  
397 on and degrade PE into smaller compounds implicating a role of the gut microbiota. Our results  
398 showed no PE bio-assimilation in either axenic or conventional larvae. Since our Gm population  
399 was able to survive on beeswax and develop on beeswax-pollen and assimilate perdeuterated oil,  
400 it seems to possess the required enzymes to efficiently metabolize long- and short-length  
401 hydrocarbons. The absence of bio-assimilation even in conventional larvae with an intact  
402 microbiota could indicate that our Gm population lacked the bacterial strains capable of  
403 degrading PE in smaller hydrocarbons that could be processed by the gut enzymes, while these  
404 bacteria were present in the Gm population referred to in the literature. However, we found  
405 weak oxidation in PE films in contact for 24 h with the dissected gut for both axenic and

406 conventional larvae and a shortening of aliphatic chains in PED4 particles excreted in the larval  
407 frass indicating that a PE oxidation capability exist in our Gm. Several groups reported isolating  
408 bacterial and fungal strains capable of digesting PE from different Gm populations: Cassone  
409 reported isolating an *Acinetobacter* sp from Gm<sup>16</sup>, while Ren reported isolating an *Enterobacter*  
410 sp<sup>12</sup>, and Zhang reported isolating an *Aspergillus flavus* strain.<sup>27</sup> Yang isolated strains of *Bacillus*  
411 sp and *Enterobacter* sp able to digest PE from the Gm related *P. interpunctella* larvae.<sup>28</sup> The  
412 microbiota of our Gm population was analyzed by 16S rDNA sequencing and was shown to be  
413 composed of Bacteroidetes, Firmicutes, Cyanobacteria and Proteobacteria, and a few fungal  
414 species (supporting information). The Proteobacteria were mostly Enterobacteriaceae. Although  
415 *Acinetobacter* sp was absent, the Enterobacteriaceae strains in our Gm population suggested that  
416 its microbiota was not fundamentally different from those from other groups.<sup>18</sup> Yet, Cassone  
417 suggested that bacterial communities rather than single strains would be responsible for efficient  
418 PE biodegradation. We will further evaluate the PE-degrading capacity of the Gm microbiota in  
419 our population FTIR microspectroscopy could be used to measure the integration of C-D in  
420 microcolonies of bacteria grown on PED4 films and will be tested in our follow-up work.

421

422

423 **ACKNOWLEDGMENTS**

424 The authors acknowledge the Synchrotron SOLEIL for provision of synchrotron radiation  
425 facilities and FTIR microspectroscopy equipment. The authors also acknowledge the INRAE-  
426 Jouy-en-Josas histology platform (Abridge) for the cryo-sectioning and microscopy facilities  
427 and the INRAE-MICA department for the general support to CNLR and AR.

428 **ABBREVIATIONS**

429 Gm: *Galleria mellonella*, PE: Polyethylene, LDPE: Low Density PE, PED4: perdeuterated  
430 polyethylene, IR: infrared, FTIR: Fourier Transform Infrared,  $\mu$ FTIR: FTIR microspectroscopy

431 **AUTHOR CONTRIBUTIONS**

432 Agnès Réjasse (AR) initiated the study, designed the research, reared the insects, performed  
433 insect feeding experiments and participated in the writing of the manuscript.

434 Jehan Waeytens (JW) performed infrared microspectroscopy measurements, prepared figures and  
435 participated in the writing of the manuscript.

436 Ariane Deniset-Besseau (ADB) participated in the study design, and corrected the manuscript.

437 Nicolas Crapart (NC) performed insect cryo-section and tissue coloration.

438 Christina Nielsen-Leroux (CNLR) participated in the study design, and corrected the manuscript.

439 Christophe Sandt (CS) designed the infrared microspectroscopy study, performed the infrared  
440 microspectroscopy measurements, prepared figures and wrote the manuscript.

441

442 **DECLARATION OF INTERESTS**

443 The authors do not have any conflict of interest

444

445

- 446  
447 **REFERENCES**
- 448 (1) Geyer, R.; Jambeck, J. R.; Law, K. L. Production, Use, and Fate of All Plastics Ever Made.  
449 *Sci. Adv.* **2017**, *3* (7). <https://doi.org/10.1126/sciadv.1700782>.
- 450 (2) Tokiwa, Y.; Calabia, B.; Ugwu, C.; Aiba, S. Biodegradability of Plastics. *Int. J. Mol. Sci.* **2009**,  
451 *10* (9), 3722–3742. <https://doi.org/10.3390/ijms10093722>.
- 452 (3) Yamada-Onodera, K.; Mukumoto, H.; Katsuyaya, Y.; Saiganji, A.; Tani, Y. Degradation of  
453 Polyethylene by a Fungus, *Penicillium Simplicissimum* YK. *Polym. Degrad. Stab.* **2001**, *72*  
454 (2), 323–327. [https://doi.org/10.1016/S0141-3910\(01\)00027-1](https://doi.org/10.1016/S0141-3910(01)00027-1).
- 455 (4) Bonhomme, S.; Cuer, A.; Delort, A. M.; Lemaire, J.; Sancelme, M.; Scott, G. Environmental  
456 Biodegradation of Polyethylene. *Polym. Degrad. Stab.* **2003**, *81* (3), 441–452.  
457 [https://doi.org/10.1016/S0141-3910\(03\)00129-0](https://doi.org/10.1016/S0141-3910(03)00129-0).
- 458 (5) Yoshida, S.; Hiraga, K.; Takehana, T.; Taniguchi, I.; Yamaji, H.; Maeda, Y.; Toyohara, K.;  
459 Miyamoto, K.; Kimura, Y.; Oda, K. A Bacterium That Degrades and Assimilates  
460 Poly(Ethylene Terephthalate). *Science (80-. )*. **2016**, *351* (6278), 1196–1199.  
461 <https://doi.org/10.1126/science.aad6359>.
- 462 (6) Restrepo-Flórez, J. M.; Bassi, A.; Thompson, M. R. Microbial Degradation and  
463 Deterioration of Polyethylene - A Review. *International Biodeterioration and*  
464 *Biodegradation*. March 2014, pp 83–90. <https://doi.org/10.1016/j.ibiod.2013.12.014>.
- 465 (7) Yang, Y.; Yang, J.; Wu, W. M.; Zhao, J.; Song, Y.; Gao, L.; Yang, R.; Jiang, L. Biodegradation

- 466 and Mineralization of Polystyrene by Plastic-Eating Mealworms: Part 2. Role of Gut  
467 Microorganisms. *Environ. Sci. Technol.* **2015**, *49* (20), 12087–12093.  
468 <https://doi.org/10.1021/acs.est.5b02663>.
- 469 (8) Yang, Y.; Wang, J.; Xia, M. Biodegradation and Mineralization of Polystyrene by Plastic-  
470 Eating Superworms *Zophobas Atratus*. *Sci. Total Environ.* **2019**, 135233.  
471 <https://doi.org/10.1016/j.scitotenv.2019.135233>.
- 472 (9) Yang, S. S.; Wu, W. M.; Brandon, A. M.; Fan, H. Q.; Receveur, J. P.; Li, Y.; Wang, Z. Y.; Fan,  
473 R.; McClellan, R. L.; Gao, S. H.; et al. Ubiquity of Polystyrene Digestion and Biodegradation  
474 within Yellow Mealworms, Larvae of *Tenebrio Molitor* Linnaeus (Coleoptera:  
475 Tenebrionidae). *Chemosphere* **2018**, *212*, 262–271.  
476 <https://doi.org/10.1016/j.chemosphere.2018.08.078>.
- 477 (10) Peng, B. Y.; Su, Y.; Chen, Z.; Chen, J.; Zhou, X.; Benbow, M. E.; Criddle, C. S.; Wu, W. M.;  
478 Zhang, Y. Biodegradation of Polystyrene by Dark (*Tenebrio Obscurus*) and Yellow  
479 (*Tenebrio Molitor*) Mealworms (Coleoptera: Tenebrionidae). *Environ. Sci. Technol.* **2019**,  
480 *53* (9), 5256–5265. <https://doi.org/10.1021/acs.est.8b06963>.
- 481 (11) Bombelli, P.; Howe, C. J.; Bertocchini, F. Polyethylene Bio-Degradation by Caterpillars of  
482 the Wax Moth *Galleria Mellonella*. *Curr. Biol.* **2017**, *27* (8), R292–R293.  
483 <https://doi.org/10.1016/j.cub.2017.02.060>.
- 484 (12) Ren, L.; Men, L.; Zhang, Z.; Guan, F.; Tian, J.; Wang, B.; Wang, J.; Zhang, Y.; Zhang, W.  
485 Biodegradation of Polyethylene by *Enterobacter* Sp. D1 from the Guts of Wax Moth



- 486 Galleria Mellonella. *Int. J. Environ. Res. Public Health* **2019**, *16* (11).  
487 <https://doi.org/10.3390/ijerph16111941>.
- 488 (13) Kundungal, H.; Gangarapu, M.; Sarangapani, S.; Patchaiyappan, A.; Devipriya, S. P.  
489 Efficient Biodegradation of Polyethylene (HDPE) Waste by the Plastic-Eating Lesser  
490 Waxworm (*Achroia Grisella*). *Environ. Sci. Pollut. Res. Int.* **2019**, *26* (18), 18509–18519.  
491 <https://doi.org/10.1007/s11356-019-05038-9>.
- 492 (14) Kong, H. G.; Kim, H. H.; Chung, J. hui; Jun, J. H.; Lee, S.; Kim, H. M.; Jeon, S.; Park, S. G.;  
493 Bhak, J.; Ryu, C. M. The Galleria Mellonella Hologenome Supports Microbiota-  
494 Independent Metabolism of Long-Chain Hydrocarbon Beeswax. *Cell Rep.* **2019**, *26* (9),  
495 2451-2464.e5. <https://doi.org/10.1016/j.celrep.2019.02.018>.
- 496 (15) Kundungal, H.; Gangarapu, M.; Sarangapani, S.; Patchaiyappan, A.; Devipriya, S. P. Role of  
497 Pretreatment and Evidence for the Enhanced Biodegradation and Mineralization of Low-  
498 Density Polyethylene Films by Greater Waxworm. *Environ. Technol. (United Kingdom)*  
499 **2019**. <https://doi.org/10.1080/09593330.2019.1643925>.
- 500 (16) Cassone, B. J.; Grove, H. C.; Elebute, O.; Villanueva, S. M. P.; LeMoine, C. M. R. Role of the  
501 Intestinal Microbiome in Low-Density Polyethylene Degradation by Caterpillar Larvae of  
502 the Greater Wax Moth, *Galleria Mellonella*. *Proc. R. Soc. B Biol. Sci.* **2020**, *287* (1922),  
503 20200112. <https://doi.org/10.1098/rspb.2020.0112>.
- 504 (17) Roy, D. N. On the Nutrition of Larvae of Bee-Wax Moth, *Galleria Mellonella*. *Z. Vgl.*  
505 *Physiol.* **1937**, *24* (5), 638–643. <https://doi.org/10.1007/BF00592301>.

- 506 (18) Lou, Y.; Ekaterina, P.; Yang, S. S.; Lu, B.; Liu, B.; Ren, N.; Corvini, P. F. X.; Xing, D.  
507 Biodegradation of Polyethylene and Polystyrene by Greater Wax Moth Larvae (*Galleria*  
508 *Mellonella* L.) and the Effect of Co-Diet Supplementation on the Core Gut Microbiome.  
509 *Environ. Sci. Technol.* **2020**, *54* (5), 2821–2831. <https://doi.org/10.1021/acs.est.9b07044>.
- 510 (19) Weber, C.; Pusch, S.; Opatz, T. Polyethylene Bio-Degradation by Caterpillars? *Current*  
511 *Biology*. Cell Press August 7, 2017, pp R744–R745.  
512 <https://doi.org/10.1016/j.cub.2017.07.004>.
- 513 (20) Dumas, P.; Polack, F.; Lagarde, B.; Chubar, O.; Giorgetta, J. L.; Lefrançois, S. Synchrotron  
514 Infrared Microscopy at the French Synchrotron Facility SOLEIL. *Infrared Phys. Technol.*  
515 **2006**, *49* (1–2), 152–160. <https://doi.org/10.1016/j.infrared.2006.01.030>.
- 516 (21) Demšar, J.; Curk, T.; Erjavec, A.; Hočevar, T.; Milutinovič, M.; Možina, M.; Polajnar, M.;  
517 Toplak, M.; Starič, A.; Stajdohar, M.; et al. Orange: Data Mining Toolbox in Python. *J.*  
518 *Mach. Learn. Res.* **2013**, *14*, 2349–2353.
- 519 (22) Toplak, M.; Birarda, G.; Read, S.; Sandt, C.; Rosendahl, S. M.; Vaccari, L.; Demšar, J.;  
520 Borondics, F. Infrared Orange: Connecting Hyperspectral Data with Machine Learning.  
521 *Synchrotron Radiat. News* **2017**, *30* (4), 40–45.  
522 <https://doi.org/10.1080/08940886.2017.1338424>.
- 523 (23) Marshall, C.; Javaux, E.; Knoll, a; Walter, M. Combined Micro-Fourier Transform Infrared  
524 (FTIR) Spectroscopy and Micro-Raman Spectroscopy of Proterozoic Acritarchs: A New  
525 Approach to Palaeobiology. *Precambrian Res.* **2005**, *138* (3–4), 208–224.

- 526 <https://doi.org/10.1016/j.precamres.2005.05.006>.
- 527 (24) Billen, P.; Khalifa, L.; Van Gerven, F.; Tavernier, S.; Spatari, S. Technological Application  
528 Potential of Polyethylene and Polystyrene Biodegradation by Macro-Organisms Such as  
529 Mealworms and Wax Moth Larvae. *Sci. Total Environ.* **2020**, *735*, 139521.  
530 <https://doi.org/10.1016/j.scitotenv.2020.139521>.
- 531 (25) Lemoine, C. M. R.; Grove, H. C.; Smith, C. M.; Cassone, B. J. A Very Hungry Caterpillar:  
532 Polyethylene Metabolism and Lipid Homeostasis in Larvae of the Greater Wax Moth  
533 (*Galleria Mellonella*). *Environ. Sci. Technol.* **2020**, *54* (22), 14706–14715.  
534 <https://doi.org/10.1021/acs.est.0c04386>.
- 535 (26) Yang, Y.; Yang, J.; Wu, W. M.; Zhao, J.; Song, Y.; Gao, L.; Yang, R.; Jiang, L. Biodegradation  
536 and Mineralization of Polystyrene by Plastic-Eating Mealworms: Part 1. Chemical and  
537 Physical Characterization and Isotopic Tests. *Environ. Sci. Technol.* **2015**, *49* (20), 12080–  
538 12086. <https://doi.org/10.1021/acs.est.5b02661>.
- 539 (27) Zhang, J.; Gao, D.; Li, Q.; Zhao, Y.; Li, L.; Lin, H.; Bi, Q.; Zhao, Y. Biodegradation of  
540 Polyethylene Microplastic Particles by the Fungus *Aspergillus Flavus* from the Guts of Wax  
541 Moth *Galleria Mellonella*. *Sci. Total Environ.* **2020**, *704*, 135931.  
542 <https://doi.org/10.1016/j.scitotenv.2019.135931>.
- 543 (28) Yang, J.; Yang, Y.; Wu, W. M.; Zhao, J.; Jiang, L. Evidence of Polyethylene Biodegradation  
544 by Bacterial Strains from the Guts of Plastic-Eating Waxworms. *Environ. Sci. Technol.*  
545 **2014**, *48* (23), 13776–13784. <https://doi.org/10.1021/es504038a>.

546 **FIGURES**

547

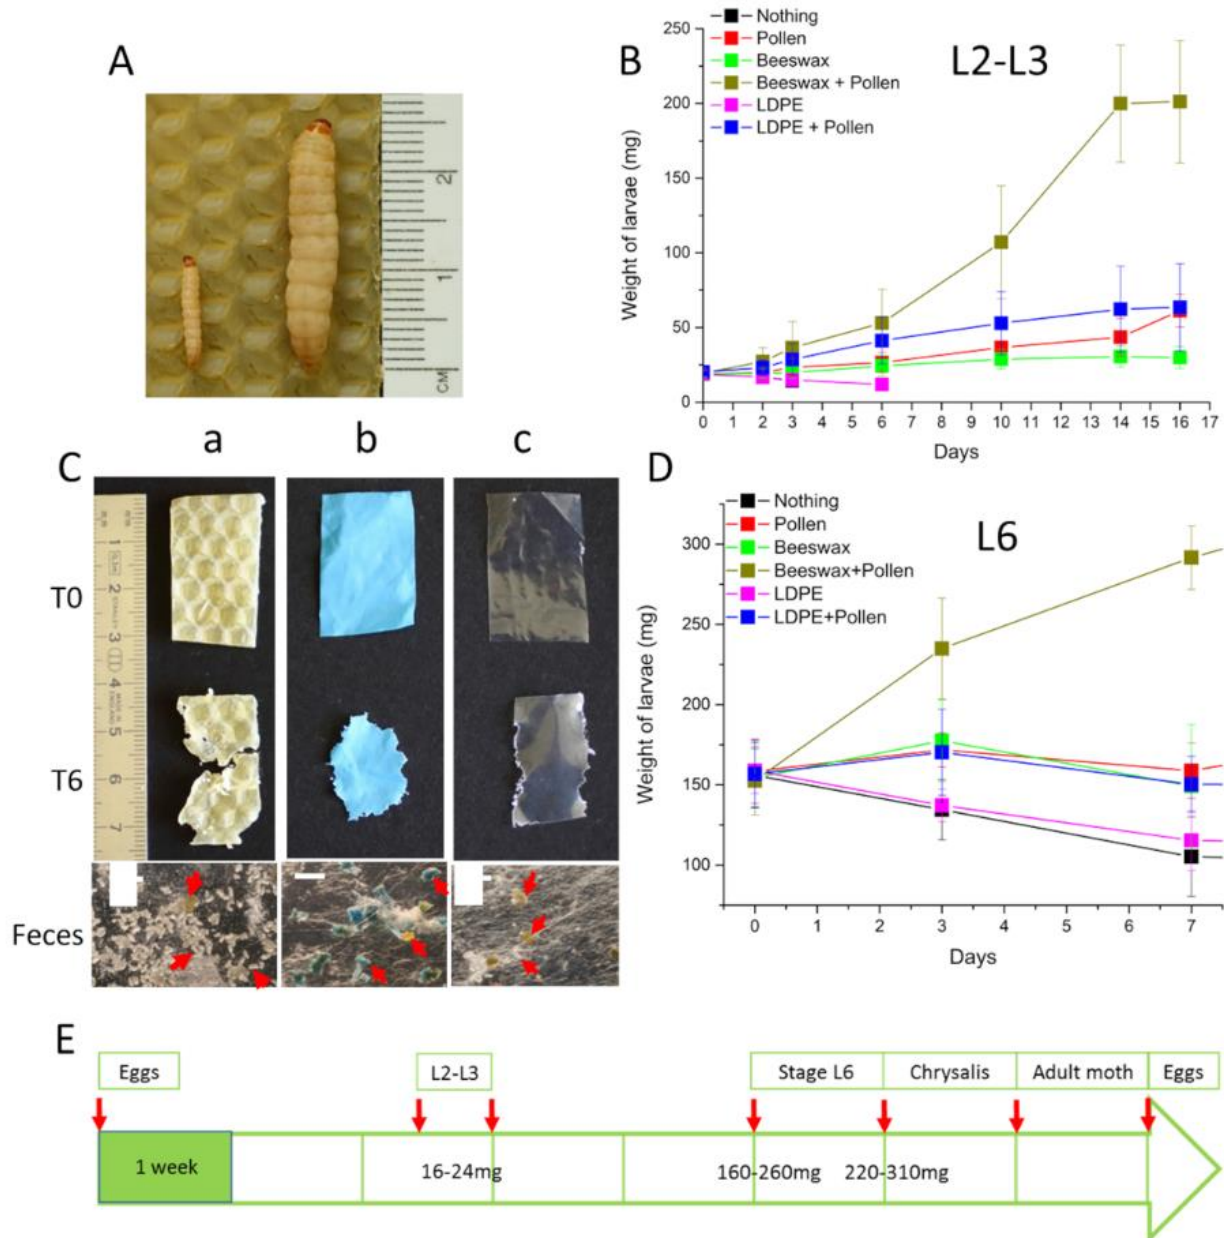

548

549 **Figure 1. Evaluation of the nutritional value of different diets in Gm** A) Gm larvae on  
 550 beeswax: L2-L3 stage on the left, L6 stage on the right. B) Growth curve of L2-L3 Gm larvae fed  
 551 different diets. C) Pictures evidencing the consumption of beeswax or LDPE and the excretion of  
 552 LDPE in feces. Arrows show the feces among the silk fibers. Scale bars: 2 mm. D) Growth curve  
 553 of last stage L6 Gm fed different diets. E) Typical Gm larva evolution time scale (weeks) and  
 554 larval weight (L2 –L3 and L6) when fed with beeswax and pollen. Larvae were reared at 27 °C.  
 555

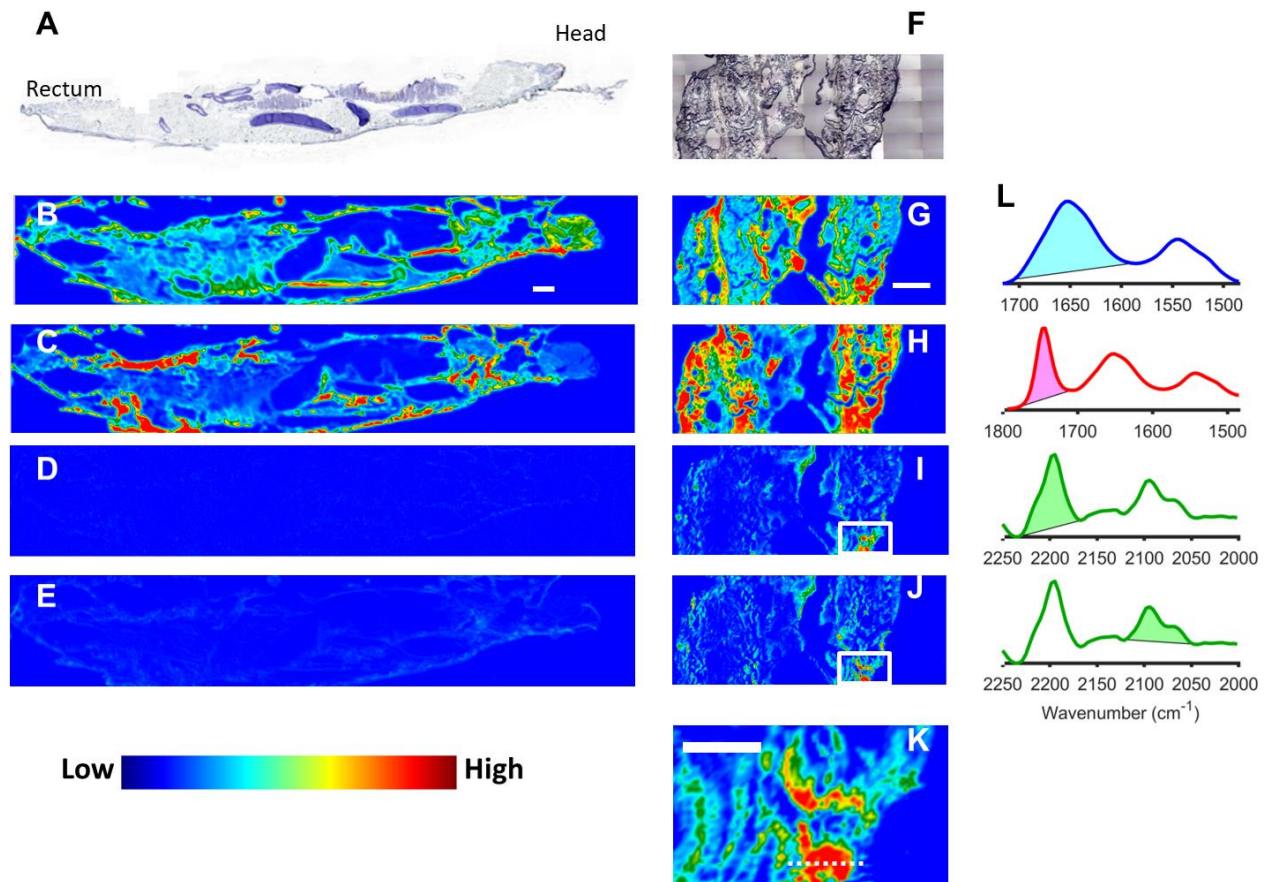

556  
 557 **Figure 2. Spectral histology of *Gm* larvae and detection of C16D34 signal in larva sections.**  
 558 A-E) Micrographs of section of a control larva (4X magnification). A) Bright field of cresyl  
 559 violet stained section. B-E) Infrared spectral histology maps showing: the distribution of B)  
 560 proteins, and C) lipids; the absence of C-D peak at D) 2197 cm<sup>-1</sup>, and at E) 2098 cm<sup>-1</sup>. This  
 561 shows that deuterium is not found in the control larva.  
 562 F-K) Micrographs of unstained larva fed 72h with C16D34 oil. F) Bright field of the unstained  
 563 section. G-K) Infrared maps of G) protein distribution, H) lipid distribution. The detection of C-  
 564 D peaks in the deuterated oil fed larvae is evidenced in I) by the 2197 cm<sup>-1</sup> C-D peak area from  
 565 CD2 asymmetric stretching, and in J) by the 2098 cm<sup>-1</sup> C-D peak area from CD2 symmetric  
 566 stretching). K) Zoom on a C-D rich region delimited by a box in images I and J. Scale bars: 0.5  
 567 mm. L) The peak area used for plotting the spectral maps, in descending order: protein amide I,  
 568 lipid ester C=O, symmetrical and asymmetrical C-D stretching peaks of the C<sub>16</sub>D<sub>34</sub> oil.  
 569



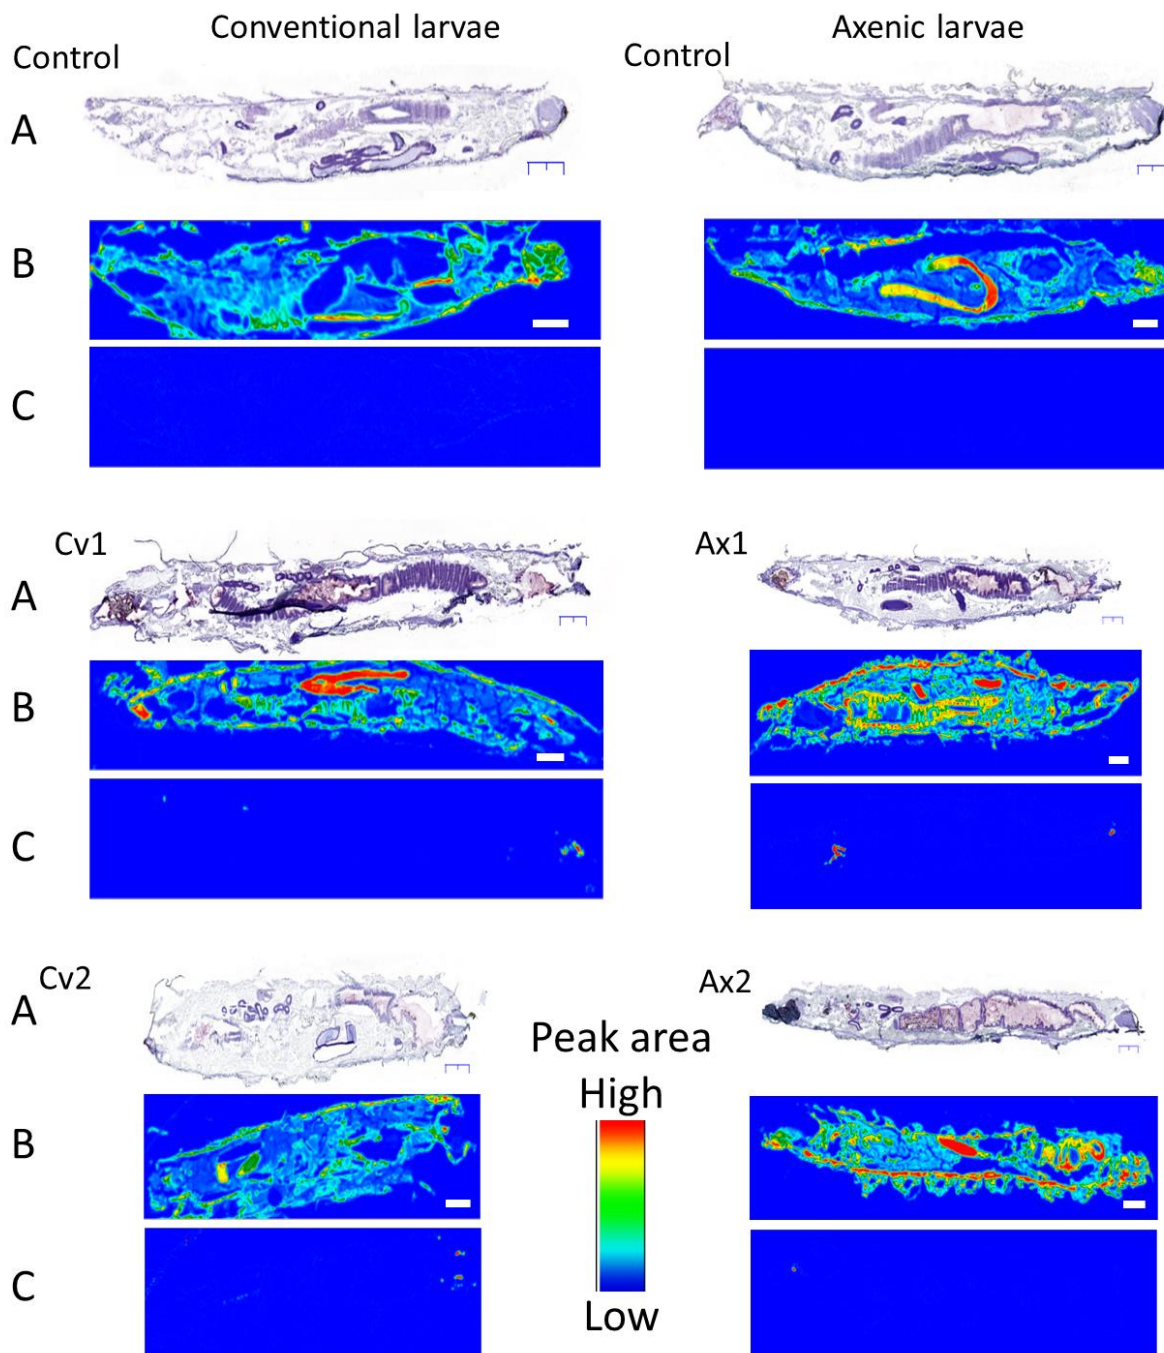

570  
571 **Figure 3. Presence of C-D signal in Gm larvae fed with PED4.** Conventional (Cv) and axenic  
572 (Ax) control larvae were fed with non-deuterated PE for 3 days, and test larvae were fed with  
573 deuterated PE for 3 days (Cv1 and Ax1). Cv2 and Ax2 larvae were fed with alternating diets (see  
574 methods) over a period of 19 days. Sections were stained with cresyl-violet and observed in  
575 bright field microscopy (A) or kept unstained and analyzed by  $\mu$ FTIR (B and C). The IR  
576 hyperspectral images show the distribution of B) proteins ( $1650\text{ cm}^{-1}$  amide I peak area) and C)  
577 deuterated PE ( $2197\text{ cm}^{-1}$  C-D peak area). No deuterated molecules were found in the tissue of  
578 the conventional and axenic control larvae, and in the Cv1, Ax1, Cv2 and Ax2 larvae but few  
579 deuterated PE particles were detected in the mouth, gut, and rectum of both Cv and Ax larvae

580 Spectra from such particles are shown in Figure S1F. Scale bar: 1 mm and magnification was 4X  
581 in both IR and visible micrographs.  
582  
583  
584
